# Supplementary material for: ClpXP and ClpAP proteolytic activity on divisome substrates is differentially regulated following the Caulobacter asymmetric cell division
Source: PubMed Central journal article supplement — Mol Microbiol. 2014 Aug 7;93(5):853–66. doi: 10.1111/mmi.12698 (PMC4285227; doi:10.1111/mmi.12698), 2014-08-07
Supplement: mmi0093-0853-SD1.pdf [file mmi0093-0853-SD1.pdf]

Table 1. Plasmids used in this study

| Plasmids  | Relavant characteristics or construction                                                                            | Source or reference             |
|-----------|---------------------------------------------------------------------------------------------------------------------|---------------------------------|
| pBXMCS-2  | High-copy replicating plasmid for xylose-inducible gene expression, kan <sup>R</sup>                                | Thanbichler <i>et al</i> (2007) |
| pBW005    | pRVMCS-5 with <i>clpX</i> * inserted between NdeI and NheI sites                                                    | This Study                      |
| pBW015    | pVGFPC-1 with <i>clpX</i> inserted between NdeI and PacI sites                                                      | This Study                      |
| pBW016    | pXMCHYC-4 with <i>ftsZ</i> inserted between NdeI and PacI sites                                                     | This Study                      |
| pBW020    | pXSTZN-2 with <i>ftsZ</i> inserted between KpnI and SacI sites                                                      | This Study                      |
| pBW030    | pRVGFPC-5 with <i>clpA</i> inserted between NdeI and PacI sites                                                     | This Study                      |
| pBW041    | pBXMCS-2 with <i>ftsA</i> inserted between NdeI and PacI sites                                                      | This Study                      |
| pBW045    | pXSTZN-2 with <i>ftsZ<sub>DD</sub></i> inserted between KpnI and SacI sites                                         | This Study                      |
| pBW047    | pXSTZC-2 with <i>ftsZ</i> inserted between NdeI and AgeI sites                                                      | This Study                      |
| pBW048    | pXSTZC-2 with <i>ftsA</i> inserted between NdeI and AgeI sites                                                      | This Study                      |
| pBW062    | pET21B with <i>tap-ftsA<sub>1236-1326</sub></i> (MTS) insert from pBW061 inserted in between NdeI and SacI sites    | This Study                      |
| pEG032    | pXSTZN-2 with <i>ftsQ</i> inserted between KpnI and AgeI sites                                                      | Goley ED, unpublished           |
| pEG033    | pXSTZN-2 with <i>ftsA</i> inserted between KpnI and SacI sites                                                      | Goley ED, unpublished           |
| pET21a    | Bacterial vector for expressing N- and/or C-terminal His <sub>6</sub> -tagged proteins in <i>E. coli</i>            | Novagen                         |
| pET21b    | Bacterial vector for expressing N- and/or C-terminal His <sub>6</sub> -tagged proteins in <i>E. coli</i>            | Novagen                         |
| pMT219    | pET21a with <i>ftsZ</i> inserted between NdeI and SacI sites                                                        | Thanbichler <i>et al</i> (2006) |
| pRVGFPC-5 | Low-copy replicating plasmid for vanillate-inducible C-terminal eGFP fusions, Tet <sup>R</sup>                      | Thanbichler <i>et al</i> (2007) |
| pRVMCS-5  | Low-copy replicating plasmid for vanillate-inducible gene expression, Tet <sup>R</sup>                              | Thanbichler <i>et al</i> (2007) |
| pVGFPC-1  | Low-copy replicating plasmid for vanillate-inducible C-terminal eGFP fusions, Strep <sup>R</sup> /Spec <sup>R</sup> | Thanbichler <i>et al</i> (2007) |
| pXMCHYC-4 | Integrating plasmid for generation of C-terminal mCherry fusions at <i>xytX</i> locus, Gent <sup>R</sup>            | Thanbichler <i>et al</i> (2007) |
| pXSTZC-2  | Integrating plasmid for generation of C-terminal TAP tag fusions at <i>xytX</i> locus, Kan <sup>R</sup>             | Goley ED, unpublished           |
| pXSTZN-2  | Integrating plasmid for generation of N-terminal TAP tag fusions at <i>xytX</i> locus, Kan <sup>R</sup>             | Goley ED, unpublished           |

Table 2. *Caulobacter crescentus* strains used in this study

| Strains | Relevant genotype                                                                               | Construction or Source                                          |
|---------|-------------------------------------------------------------------------------------------------|-----------------------------------------------------------------|
| LS101   | CB15N - synchronizable derivative of wild-type strain CB15                                      | Evinger and Agabian (1997)                                      |
| LS5344  | CB15N <i>vanA::P<sub>vanA</sub>-clpX-egfp</i>                                                   | pBW015 into LS101                                               |
| LS5345  | CB15N <i>vanA::P<sub>vanA</sub>-clpX-egfp</i> , <i>xyiX::P<sub>xyiX</sub>-ftsZ-mCherry</i>      | pBW016 into LS5344                                              |
| LS5346  | CB15N <i>ftsZ::ftsZΔC xyiX::P<sub>xyiX</sub>-ftsZ</i> , <i>vanA::P<sub>vanA</sub>-clpX-egfp</i> | pBW015 into YB1585                                              |
| LS5347  | CB15N <i>xyiX::P<sub>xyiX</sub>-tap-ftsZ</i>                                                    | pBW020 into LS101                                               |
| LS5348  | CB15N <i>xyiX::P<sub>xyiX</sub>-tap-ftsA</i>                                                    | pBW033 into LS101                                               |
| LS5349  | CB15N pP <sub>vanA</sub> - <i>clpX*</i>                                                         | pBW005 into LS101                                               |
| LS5350  | CB15N pP <sub>vanA</sub> - <i>clpX*</i> , <i>xyiX::P<sub>xyiX</sub>-tap-ftsZ</i>                | pBW020 into LS5349                                              |
| LS5351  | CB15N pP <sub>vanA</sub> - <i>clpX*</i> , <i>xyiX::P<sub>xyiX</sub>-tap-ftsA</i>                | pEG033 into LS5349                                              |
| LS5352  | CB15N pP <sub>vanA</sub> - <i>clpX*</i> , <i>xyiX::P<sub>xyiX</sub>-tap-ftsQ</i>                | pEG032 into LS5349                                              |
| LS5353  | CB15N <i>xyiX::P<sub>xyiX</sub>-ftsZ-tap</i>                                                    | pBW047 into LS101                                               |
| LS5354  | CB15N <i>xyiX::P<sub>xyiX</sub>-tap-ftsZ-DD</i> (TAP-FtsZ <sub>A507D N508D</sub> )              | pBW045 into LS101                                               |
| LS5355  | CB15N <i>xyiX::P<sub>xyiX</sub>-ftsA-tap</i>                                                    | pBW048 into LS101                                               |
| LS5356  | CB15N Δ <i>clpA</i> ::Ω, <i>xyiX::P<sub>xyiX</sub>-tap-ftsZ</i>                                 | pBW020 into UJ838                                               |
| LS5357  | CB15N Δ <i>clpA</i> ::Ω, <i>xyiX::P<sub>xyiX</sub>-tap-ftsA</i>                                 | pEG033 into UJ838                                               |
| LS5358  | CB15N Δ <i>clpA</i> ::Ω, <i>xyiX::P<sub>xyiX</sub>-tap-ftsQ</i>                                 | pEG032 into UJ838                                               |
| LS5359  | CB15N pP <sub>vanA</sub> - <i>clpX*</i> , pP <sub>xyiX</sub> - <i>ftsA</i>                      | pBW041 into LS5349                                              |
| LS5360  | CB15N pP <sub>vanA</sub> - <i>clpA-egfp</i>                                                     | pBW030 into LS101                                               |
| LS5361  | CB15N Δ <i>clpA</i> ::Ω, pP <sub>vanA</sub> - <i>clpA-egfp</i>                                  | pBW030 into UJ838                                               |
| LS5362  | CB15N Δ <i>clpA</i> ::Ω <i>ftsZ::ftsZΔC xyiX::P<sub>xyiX</sub>-ftsZ</i>                         | Transduction of Δ <i>clpA</i> ::Ω Spec <sup>R</sup> into YB1585 |
| LS5363  | CB15N <i>ftsZ::ftsZΔC xyiX::P<sub>xyiX</sub>-ftsZ</i> pP <sub>vanA</sub> - <i>clpX*</i>         | pBW005 into YB1585                                              |
| LS5364  | CB15N pP <sub>xyiX</sub> - <i>ftsA</i>                                                          | pBW041 into LS101                                               |
| LS5365  | CB15N Δ <i>clpA</i> ::Ω pP <sub>xyiX</sub> - <i>ftsA</i>                                        | pBW041 into YB1585                                              |
| LS5366  | CB15N pP <sub>vanA</sub> - <i>clpX*</i> , <i>xyiX::P<sub>xyiX</sub>-ftsA-tap</i>                | pBW048 into LS5349                                              |
| LS5367  | CB15N Δ <i>clpA</i> ::Ω, <i>xyiX::P<sub>xyiX</sub>-ftsA-tap</i>                                 | pBW048 into UJ838                                               |
| UJ838   | CB15N Δ <i>clpA</i> ::Ω                                                                         | Grunenfelder <i>et al</i> (2004)                                |
| YB1585  | CB15N <i>ftsZ::ftsZΔC xyiX::P<sub>xyiX</sub>-ftsZ</i>                                           | Wang <i>et al</i> (2001)                                        |

## Supplementary Figures

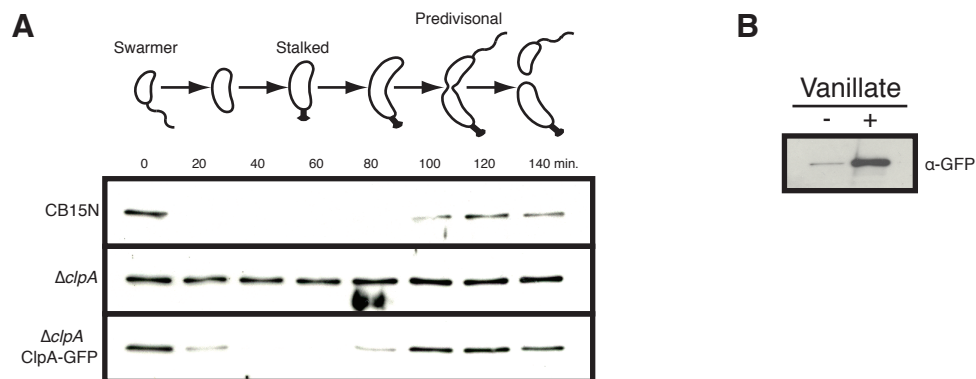

**Fig. S1.** Intracellular levels of FliF and ClpA-GFP. (A) ClpA-GFP rescues cell cycle dependent degradation of the FliF ClpA substrate. Swarmer cells from strains CB15N wild type,  $\Delta clpA$  or  $\Delta clpA$ :  $pP_{vanA}$ - $clpA$ - $egfp$  induced with 50 mM vanillate for two hours, were isolated and allowed to progress synchronously through the cell cycle. Aliquots were taken at 20-minute intervals and subjected to immunoblot analysis using FliF-specific antiserum. (B) Intracellular levels of ClpA-GFP. Cells of the strain  $\Delta clpA$   $pP_{vanA}$ - $clpA$ - $gfp$  were grown to exponential phase in M2G medium, induced with 0.5 mM vanillate for 2 h, and analyzed by immunoblotting using anti-GFP antiserum (+ van). As a control, uninduced cells were subjected to the same analysis (- van).

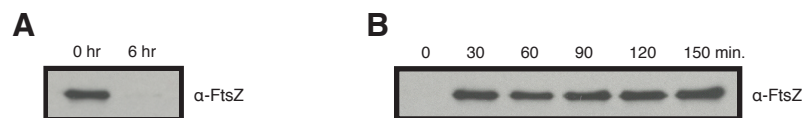

**Fig. S2.** Intracellular levels of FtsZ. (A) Immunoblots of samples taken concurrently with the fluorescence microscopy. A sample of cells from a mixed population of the strain  $ftsZ::ftsZ\Delta C$   $xyiX::P_{xyiX}$ - $ftsZ$   $P_{vanA}$ - $clpX$ - $egfp$  grown in minimal media supplemented with 0.3% xylose was taken before the population of cells was washed and resuspended in minimal media lacking xylose. A sample of cells was subsequently taken again after growth in the absence xylose for six hours. Each sample was then subjected to immunoblot analysis with anti-sera specific for FtsZ. (B) FtsZ levels upon reinduction with xylose after a six-hour depletion. A population of cells from the same population used above was resuspended in media supplemented with 0.3% xylose. A sample of cells was taken every 30 minutes (starting with  $t = 0$ ) and subjected to immunoblot analysis with antisera specific to FtsZ.

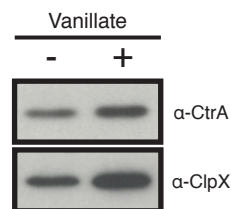

**Fig. S3.** Levels of CtrA and ClpX in the presence or absence of vanillate. (A) Cells from the strain  $pP_{vanA}$ - $clpX$ \* were grown in rich PYE media in the presence of the vanillate inducer for two hours. Aliquots were taken before and after the addition of vanillate and subjected to immunoblot analysis using CtrA or ClpX-specific antiserum.

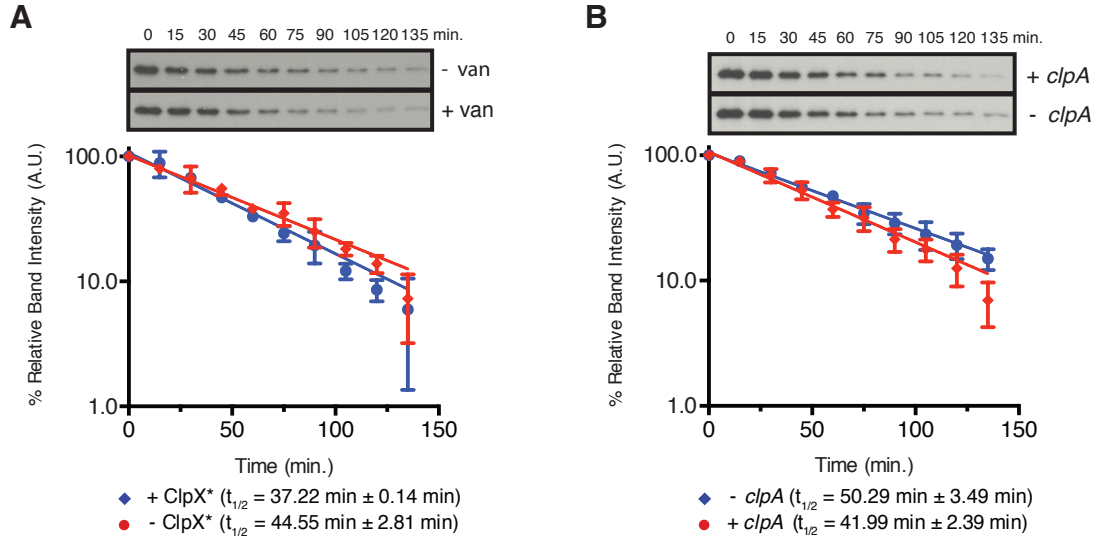

**Fig. S4.** FtsQ is not a substrate of ClpXP and ClpAP *in vivo*. (A) Levels of TAP-FtsQ in the presence or absence of ClpX\*. ClpX\* is a dominant, catalytically inactive mutant of ClpX. Cells from the strain  $pP_{vanA}-clpX^* xylX::P_{xylX}-tap-ftsQ$  were grown in rich PYE media in the presence of vanillate and xylose for two hours. Cells were then washed and resuspended in media lacking xylose. Aliquots were taken at 15-minute intervals and subjected to immunoblot analysis using TAP-specific antiserum in the presence or absence of the vanillate inducer. (B) Levels of TAP-FtsQ in the presence or absence of ClpA. Cells from the strain  $\Delta clpA::\Omega xylX::P_{xylX}-tap-ftsQ$  were grown in rich PYE media in the presence of xylose for two hours, washed and resuspended in media lacking xylose. Aliquots were then taken at 15-minute intervals and subjected to immunoblot analysis using TAP-specific antiserum in the presence or absence of clpA allele. A graph of the relative band intensity as a function of time after the cessation of TAP-FtsQ synthesis is shown below each immunoblot.

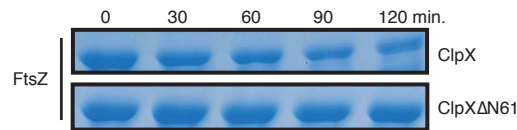

**Fig. S5.** ClpX N-terminal domain is important for proteolysis of FtsZ. Representative images of reactions showing purified *Caulobacter* FtsZ in the presence of ClpXP or ClpX( $\Delta$ N61)P and ATP *in vitro*. Reaction conditions consist of  $1 \mu\text{M}$  ClpX<sub>6</sub> or  $1 \mu\text{M}$  ClpX( $\Delta$ N61)<sub>6</sub>,  $1 \mu\text{M}$  ClpP<sub>14</sub> and  $1 \mu\text{M}$  FtsZ.

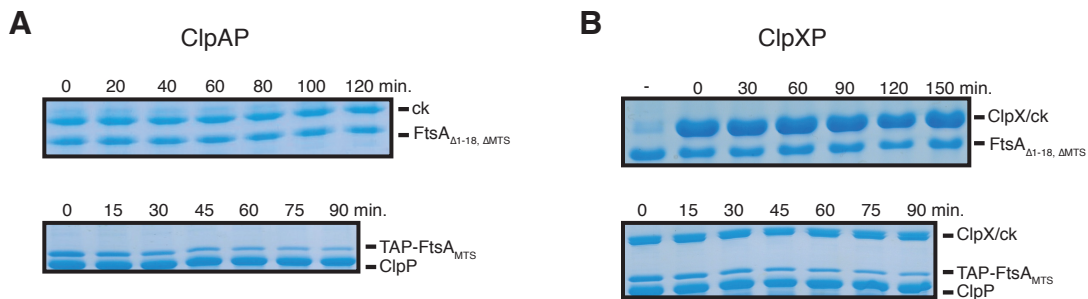

**Fig. S6.** The N- and C-terminus of FtsA is important for proteolysis by ClpAP and ClpXP. (A and B) Representative images of reactions showing purified FtsA $\Delta$ 1-18,  $\Delta$ MTS or TAP-FtsA<sub>MTS</sub> in the presence of ClpAP or ClpXP and ATP *in vitro*. Reaction conditions consist of  $1 \mu\text{M}$  ClpA<sub>6</sub> or  $1 \mu\text{M}$  ClpX<sub>6</sub>,  $1 \mu\text{M}$  ClpP<sub>14</sub> and  $1 \mu\text{M}$  FtsA $\Delta$ 1-18,  $\Delta$ MTS (or  $1.5 \mu\text{M}$  FtsA $\Delta$ 1-18,  $\Delta$ MTS in Fig. S6B) and  $1 \mu\text{M}$  TAP-FtsA<sub>MTS</sub>.
